# Supplementary material
Source: PubMed Central journal article supplement (PMC1413644)
Supplement: pnas_0509083103_4.pdf [file pnas_0509083103_4.pdf]

EcoRV

## Wild-type (n =20)

GATGGTGCAGGAT ATCCTGCTGATGA  
CTACCACGTCCTA TAGGACGACTACT

## Insertions

GATGGTGCAGGATGATCCTGCTGATGA  
CTACCACGTCCTACTAGGACGACTACT

GATGGTGCAGGATCATCCTGCTGATGA  
CTACCACGTCCTAGTAGGACGACTACT

GATGGTGCAGGATAATCCTGCTGATGA  
CTACCACGTCCTATTAGGACGACTACT 4x

GATGGTGCAGGATTATCCTGCTGATGA  
CTACCACGTCCTAATAGGACGACTACT 4x

GATGGTGCAGGATC /Δ173 ACCGGCGATGAG  
CTACCACGTCCTAG TGGCCGCTACTC

GATGGTGCAGGATA /Δ328 AGTATGAAGCG  
CTACCACGTCCTAT TCATACTTCCGC

## Deletions (without insertion)

GATGGTGCAGG Δ2/ ATCCTGCTGATGA 2x  
CTACCACGTCCTA GGACGACTACT

GATGGTGCAGG /Δ97 ATGTGGTGGATG  
CTACCACGTCCTA CACCACCTAC

GATGGTGCAGGAT /Δ123 ACCCACGGCATG  
CTACCACGTCCTA TGGGTGCCGTAC

TCATTGAGCTCC Δ1590/ ATCCTGCTGATG  
AGTAAGTCGAGG TAGGACGACTAC

GTCGGTTTCCG Δ127/Δ124 CCCACGGCATGG  
CAGCCAAAGGCG GGTGCCGTACC

ATGGATGAGCA Δ16/Δ422 GAGAAATGGTCC  
TACCTACTCGTCT CTTTACCAGG

AATCCCGAATC Δ203/Δ798 TTACCTGTTCCG  
TTAGGGCTTAGA ATGGACAAGGC

## LigD-(D136A-D138A) (n = 22)

GATGGTGCAGG Δ2/ ATCCTGCTGATGA 2x  
CTACCACGTCCTA GGACGACTACT

GATGGTGCAGGAT /Δ138 CCAATGAATCGT  
CTACCACGTCCTA GGTTACTTAGCA

GTCATGGATGAG Δ18/ ATCCTGCTGATGA  
CAGTACCTACTC TAGGACGACTACT

GATGGTGCAGGA /Δ150 TCTGACCGATGAT  
CTACCACGTCCTA GACTGGCTACTA

AACTGTGGAGCG Δ218/ ATCCTGCTGATGA  
TTGACACCTCGC TAGGACGACTACT

GATGGTGCAGGAT /Δ888 GTCGCTCCACAA  
CTACCACGTCCTA CAGCGAGGTGTT

TTACTCGCTCAC Δ748/ ATCCTGCTGATGA  
AATGAGCGAGTG TAGGACGACTACT

GATGGTGCAGGAT /Δ302 ATCTGTGATCC  
CTACCACGTCCTA TAGACAGCTAGG

TCTGCATGGTAC Δ1114/ ATCCTGCTGATGA  
AGACGTACCATG TAGGACGACTACT

GATGGTGCAGGA /Δ546 TCAAGTATCCCCGT  
CTACCACGTCCTA GTCATAGGGGCA

GGATTGAAAATG Δ107/Δ77 GTGCGACCG  
CCTAACTTTTACCA CGCTGGC

GATGGTGCAGGAT /Δ591 GGATCAGTCTGCTG  
CTACCACGTCCTA GTCAGCGAC

TGATGATTTCA Δ419/Δ306 GTCGATCCTT  
ACTACTAAAGTC AGCTAGGAA

GATGGTGCAGGAT /Δ1960 GGCCATGTCTGC  
CTACCACGTCCTA CCGGTACAGACG

GTGGTTATGC Δ268/Δ890 CGCGCTCCAC  
CACCAATACGGC GCGAGGTG

GATGGTGCAGGAT /Δ2084 CCCCATCATCCA  
CTACCACGTCCTA GGGGTAGTAGGT

GCAAAAAAG Δ1538/Δ638 CGGCGGTGAT  
CGTTTTTTCGCC GCCACTA

GATGGTGCAGGAT /Δ2251 AGCCGCCGTCCC  
CTACCACGTCCTA TCGGCGGCAGGG

CGCCGTTTAC Δ1181/Δ1835 CGGTTTCCA 2x  
GCGGCAAGTGCC CAAAGGT

## Deletion--Recombination

GATGGTGCAGG Δ2/Δ8 GAAGCAGAACA  
CTACCACGTCCT CTTTCTTGT

GAGTCAGGCAACTATGGATGAACGAAATAGACAGATCGCTGA

+42 nt intramolecular
