# Supplementary material
Source: PubMed Central journal article supplement (PMC1413644)

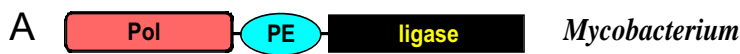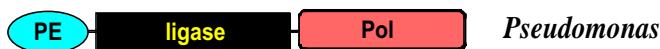

**B**

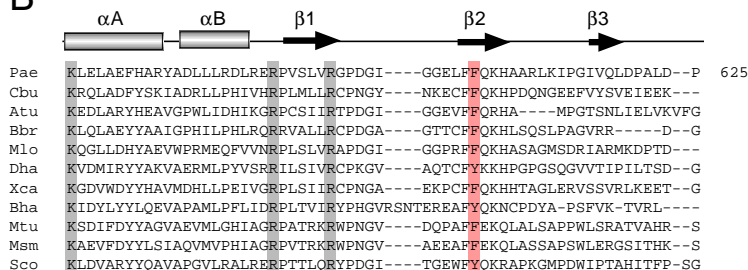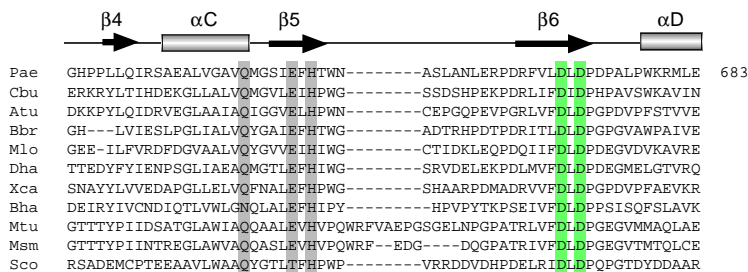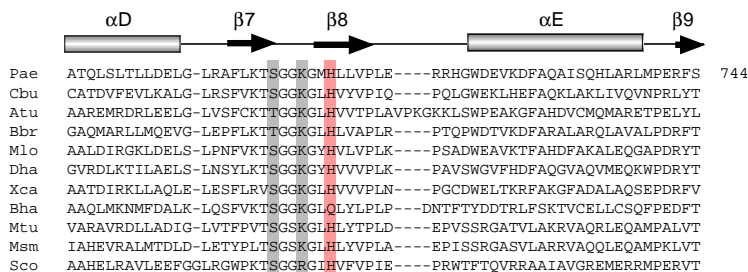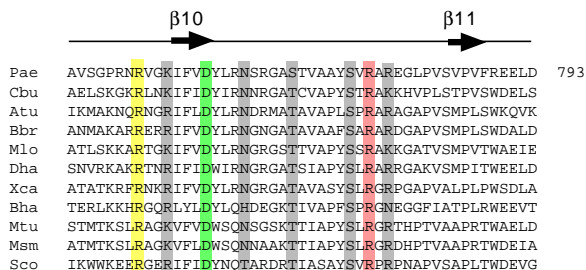

Supplement: pnas_0509083103_1.pdf [file pnas_0509083103_1.pdf]

**A**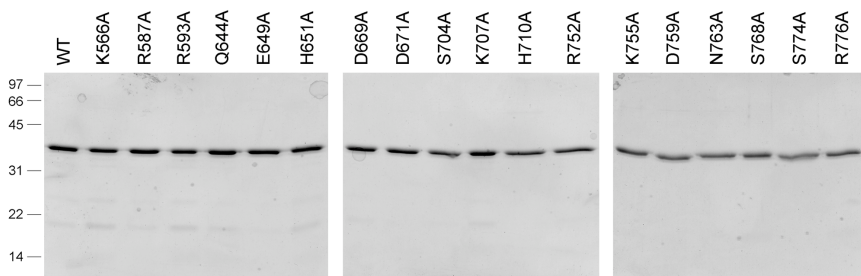**B**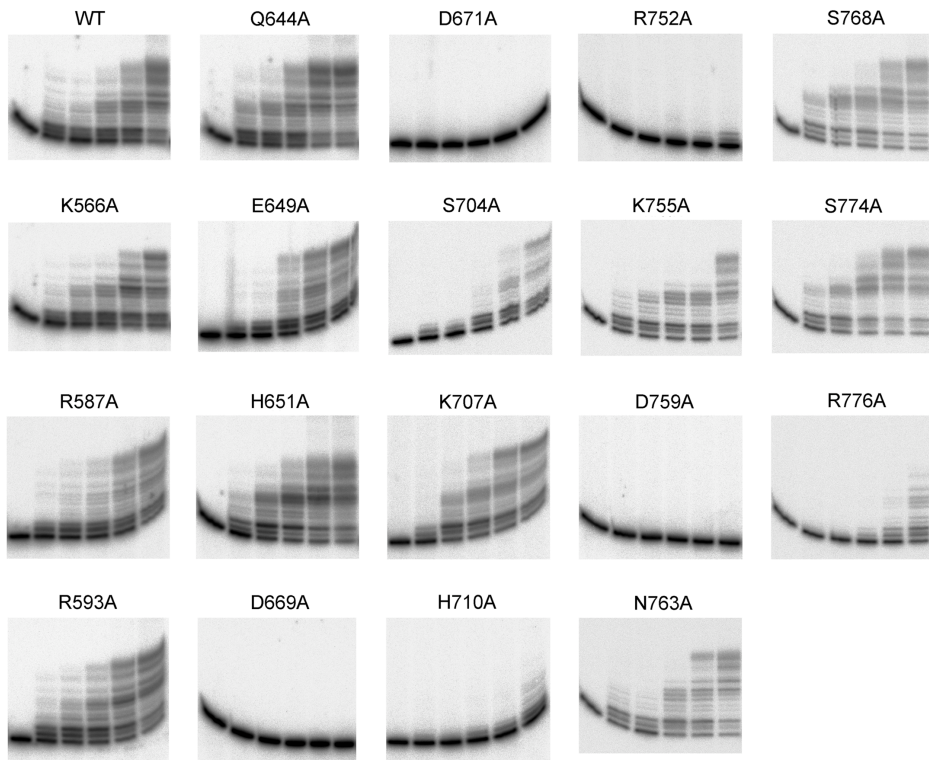

•  
 CATATCCGTGTCGCCCTT  
 GTATAGGCACAGCGGAATAAGGCTATCACTGATGT

Supplement: pnas_0509083103_2.pdf [file pnas_0509083103_2.pdf]

**A**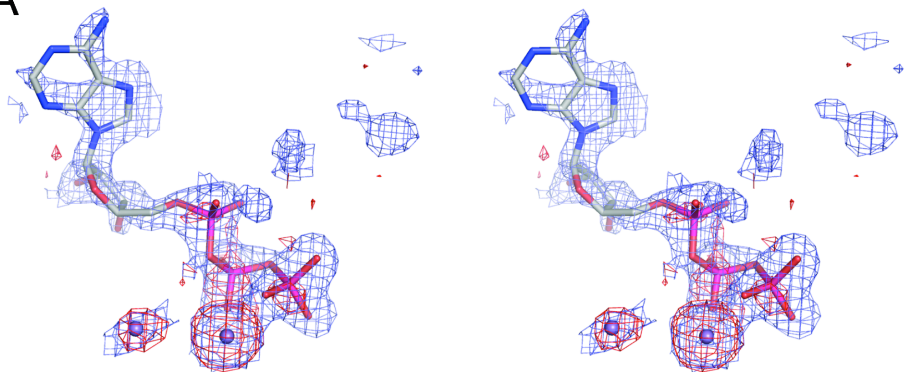**B**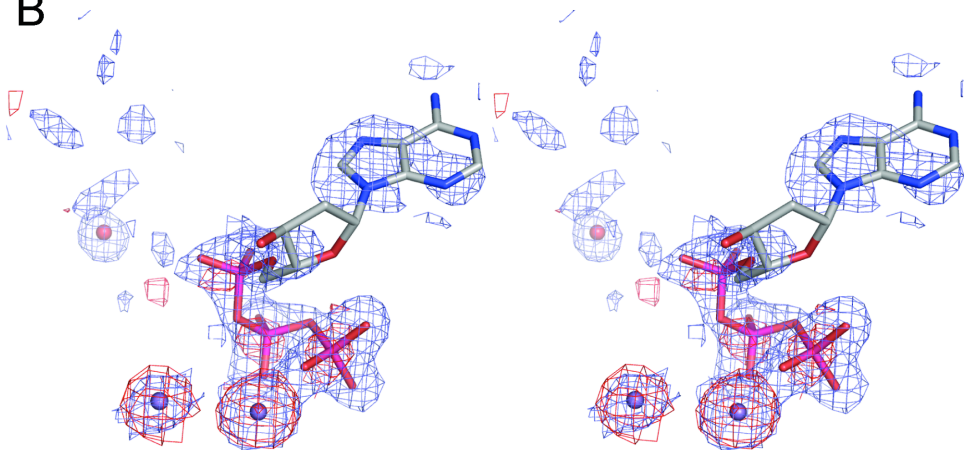

Supplement: pnas_0509083103_3.pdf [file pnas_0509083103_3.pdf]
